# Supplementary material for: Investigation of Al droplet wetting behavior on highly-oriented SiC
Source: Royal Society of Chemistry journal article supplement (doi:10.1039/d3ra03335j), 2023-01-01
Supplement: d3ra03335j1.pdf [file d3ra03335j1.pdf]

## Investigation of Al droplet wetting behavior on highly-oriented SiC

Song ZHANG<sup>1</sup>, Kaixin ZUO<sup>2</sup>, Pengjian LU<sup>2,3</sup>, Qingfang XU<sup>1,\*</sup>, Meijun YANG<sup>1</sup>,  
Kai LIU<sup>2</sup>, Rong TU<sup>1,4</sup>

<sup>1</sup>State Key Laboratory of Advanced Technology for Materials Synthesis and Processing, Wuhan University of Technology, 122 Luoshi Road, Wuhan 430070, People's Republic of China

<sup>2</sup>School of Materials Science and Engineering, Wuhan University of Technology, 122 Luoshi Road, Wuhan 430070, People's Republic of China

<sup>3</sup>Wuhan Tuocai Technology Co., Ltd., 147 Luoshi Road, Wuhan 430070, People's Republic of China

<sup>4</sup>Chaozhou Branch of Chemistry and Chemical Engineering Guangdong Laboratory, Chaozhou 521000, People's Republic of China

\*Corresponding author, Qingfang XU; E-mail: xuqingfanghed@163.com

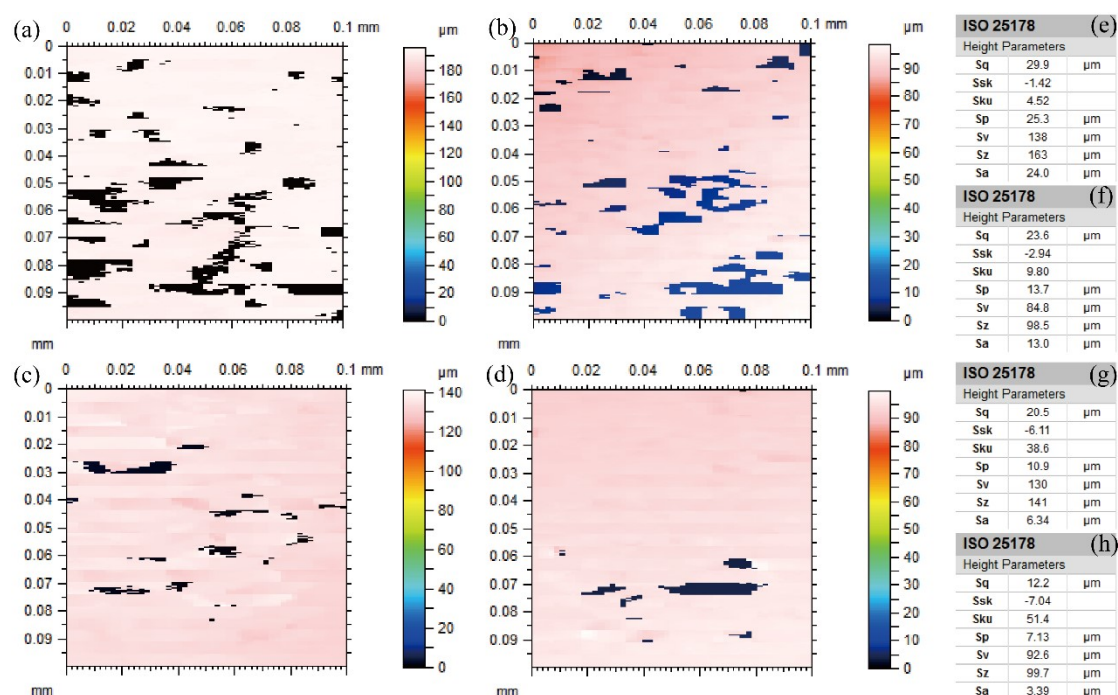

Fig. S1. (a)-(d), surface roughness topographies of samples A, A1 and samples B, B1, (e)-(h), roughness values corresponding to samples A, A1 and samples B, B1.

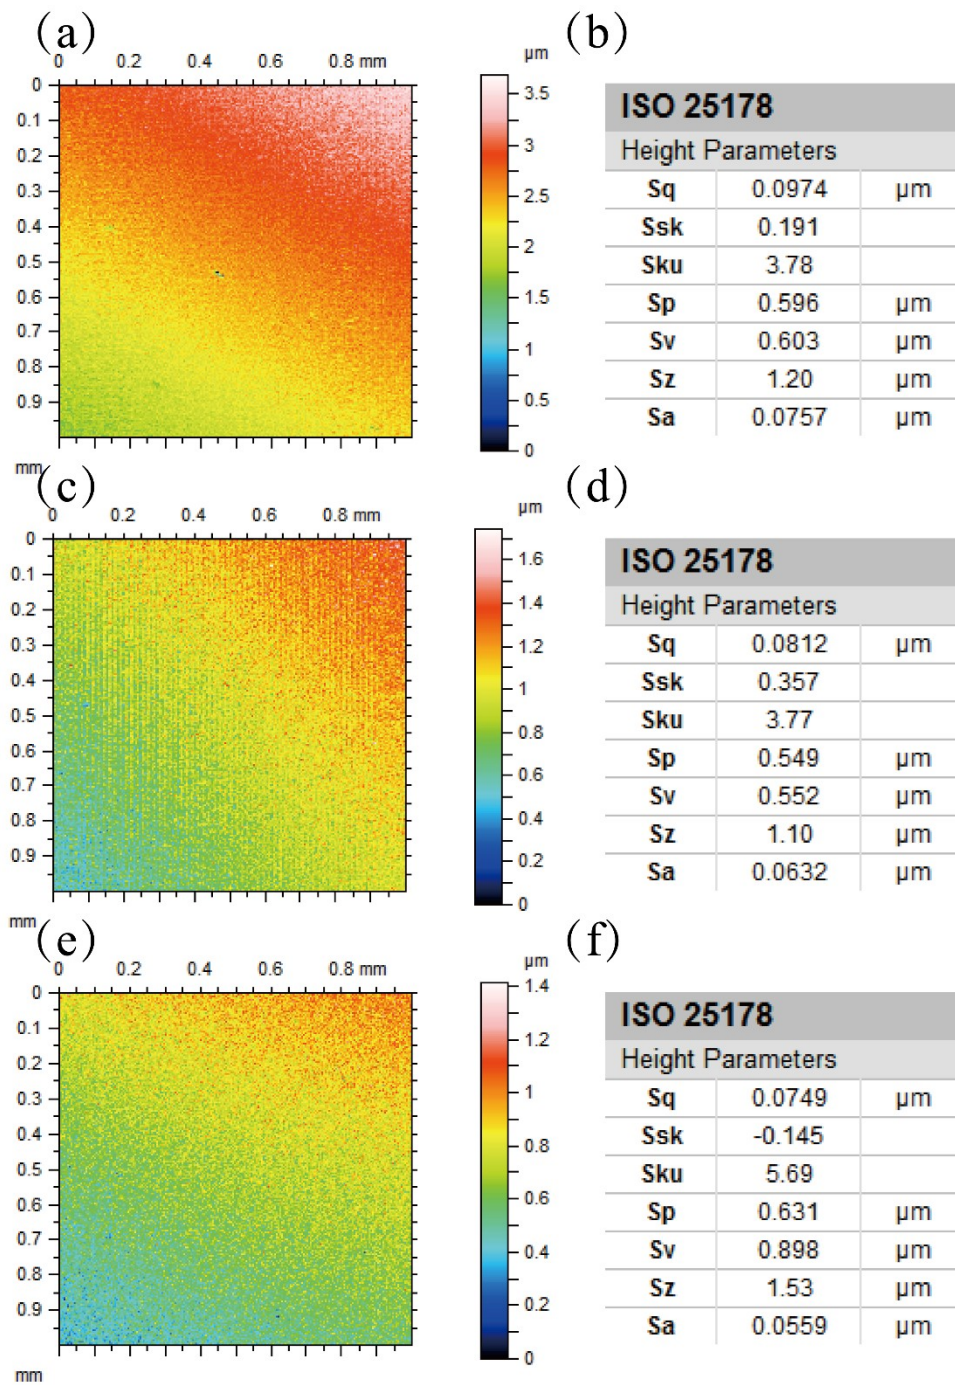

Fig. S2. Morphological plot of surface roughness of samples A, B and C after polishing and their corresponding average roughness values. (a), (d), sample A, (b), (e), sample B, (c), (f), sample C.
